# Supplementary material for: Ionic liquids with anions based on fluorosulfonyl derivatives: from asymmetrical substitutions to a consistent force field model
Source: Royal Society of Chemistry journal article supplement (doi:10.1039/c7cp06081e), 2017-01-01
Supplement: c7cp06081e1.pdf [file c7cp06081e1.pdf]

## *Supporting Information*

# Ionic liquids with anions based on fluorosulfonyl derivatives: from asymmetrical substitutions to a consistent force field model

*Andreia S. L. Gouveia,<sup>ab‡</sup> Carlos E. S. Bernardes,<sup>a‡</sup> Liliana C. Tomé,<sup>ab</sup>  
Elena I. Lozinskaya,<sup>c</sup> Yakov S. Vygodskii,<sup>c</sup> Alexander S. Shaplov,<sup>cd</sup>  
José N. Canongia Lopes<sup>a\*</sup> and Isabel M. Marrucho<sup>ab\*</sup>*

<sup>a</sup> Centro de Química Estrutural, Departamento de Engenharia Química, Instituto Superior Técnico,  
Universidade de Lisboa, Avenida Rovisco Pais, 1049-001 Lisboa, Portugal.

<sup>b</sup> Instituto de Tecnologia Química e Biológica António Xavier, Universidade Nova de Lisboa, Av. da  
República, 2780-157 Oeiras, Portugal.

<sup>c</sup> A.N. Nesmeyanov Institute of Organoelement Compounds Russian academy of sciences (INEOS RAS),  
Vavilov St., 28, 119991 Moscow, Russia

<sup>d</sup> Luxembourg Institute of Science and Technology (LIST), 5 avenue des Hauts-Fourneaux, L-4362,  
Esch-sur-Alzette, Luxembourg

\* Corresponding Authors:

Centro de Química Estrutural, Instituto Superior Técnico, 1049-001 Lisboa, Portugal.

E-mail: [jnlopes@tecnico.ulisboa.pt](mailto:jnlopes@tecnico.ulisboa.pt), [isabel.marrucho@tecnico.ulisboa.pt](mailto:isabel.marrucho@tecnico.ulisboa.pt)

<sup>‡</sup>Andreia S.L. Gouveia and Carlos E.S. Bernardes have equally contributed to this work.

**Table S1.** Experimental volumetric mass density,  $\rho$  ( $\text{g cm}^{-3}$ ), as a function of temperature for pure ILs ( $p = 0.1$  MPa).

| $T$ (K) | $\rho$ ( $\text{g cm}^{-3}$ ) |                                 |                                |                                |                                                                          |                                              |
|---------|-------------------------------|---------------------------------|--------------------------------|--------------------------------|--------------------------------------------------------------------------|----------------------------------------------|
|         | [C <sub>2</sub> mim]<br>[FSI] | [C <sub>2</sub> mim]<br>[TFSAM] | [C <sub>2</sub> mim]<br>[TSAC] | [C <sub>2</sub> mim]<br>[BETI] | [C <sub>2</sub> mim]<br>[C <sub>4</sub> F <sub>9</sub> SO <sub>3</sub> ] | [C <sub>2</sub> mim]<br>[NTf <sub>2</sub> ]* |
| 293.15  | 1.448                         | 1.352                           | 1.459                          | 1.599                          | -                                                                        | 1.524                                        |
| 298.15  | 1.443                         | 1.347                           | 1.454                          | 1.593                          | -                                                                        | 1.519                                        |
| 303.15  | 1.438                         | 1.343                           | 1.449                          | 1.588                          | 1.542                                                                    | 1.514                                        |
| 308.15  | 1.434                         | 1.339                           | 1.444                          | 1.582                          | 1.536                                                                    | 1.509                                        |
| 313.15  | 1.429                         | 1.335                           | 1.439                          | 1.577                          | 1.531                                                                    | 1.504                                        |
| 318.15  | 1.425                         | 1.330                           | 1.434                          | 1.572                          | 1.526                                                                    | 1.499                                        |
| 323.15  | 1.420                         | 1.326                           | 1.429                          | 1.566                          | 1.521                                                                    | 1.494                                        |
| 328.15  | 1.416                         | 1.322                           | 1.424                          | 1.561                          | 1.516                                                                    | 1.489                                        |
| 333.15  | 1.411                         | 1.318                           | 1.419                          | 1.555                          | 1.510                                                                    | 1.485                                        |
| 338.15  | 1.407                         | 1.314                           | 1.414                          | 1.550                          | 1.505                                                                    | 1.480                                        |
| 343.15  | 1.402                         | 1.310                           | 1.409                          | 1.544                          | 1.500                                                                    | 1.475                                        |
| 348.15  | 1.398                         | -                               | 1.404                          | 1.539                          | 1.495                                                                    | -                                            |
| 353.15  | 1.394                         | -                               | 1.399                          | 1.534                          | 1.490                                                                    | -                                            |

\* Values taken from Tomé *et al.*<sup>1</sup>

**Table S2.** Experimental dynamic viscosity,  $\eta$  (mPa s), as a function of temperature for pure ILs ( $p = 0.1$  MPa).

| $T$ (K) | $\eta$ (mPa s)                |                                 |                                |                                |                                                                          |                                              |
|---------|-------------------------------|---------------------------------|--------------------------------|--------------------------------|--------------------------------------------------------------------------|----------------------------------------------|
|         | [C <sub>2</sub> mim]<br>[FSI] | [C <sub>2</sub> mim]<br>[TFSAM] | [C <sub>2</sub> mim]<br>[TSAC] | [C <sub>2</sub> mim]<br>[BETI] | [C <sub>2</sub> mim]<br>[C <sub>4</sub> F <sub>9</sub> SO <sub>3</sub> ] | [C <sub>2</sub> mim]<br>[NTf <sub>2</sub> ]* |
| 293.15  | 22.4                          | 23.7                            | 30.4                           | 85.5                           | -                                                                        | 39.1                                         |
| 298.15  | 19.3                          | 20.2                            | 25.3                           | 68.3                           | -                                                                        | 32.4                                         |
| 303.15  | 16.8                          | 17.4                            | 21.3                           | 55.2                           | 109.7                                                                    | 27.2                                         |
| 308.15  | 14.8                          | 15.1                            | 18.1                           | 45.3                           | 86.1                                                                     | 23.1                                         |
| 313.15  | 13.1                          | 13.1                            | 15.6                           | 37.6                           | 68.7                                                                     | 19.9                                         |
| 318.15  | 11.6                          | 11.6                            | 13.6                           | 31.6                           | 55.7                                                                     | 17.3                                         |
| 323.15  | 10.4                          | 10.3                            | 11.9                           | 26.9                           | 45.7                                                                     | 15.2                                         |
| 328.15  | 9.4                           | 9.2                             | 10.5                           | 23.0                           | 38.0                                                                     | 13.4                                         |
| 333.15  | 8.5                           | 8.2                             | 9.4                            | 20.0                           | 32.0                                                                     | 11.9                                         |
| 338.15  | 7.8                           | 7.5                             | 8.4                            | 17.4                           | 27.2                                                                     | 10.7                                         |
| 343.15  | 7.1                           | 6.8                             | 7.6                            | 15.3                           | 23.3                                                                     | 9.7                                          |
| 348.15  | 6.5                           | -                               | 6.9                            | 13.5                           | 20.2                                                                     | -                                            |
| 353.15  | 6.0                           | -                               | 6.3                            | 12.1                           | 17.6                                                                     | -                                            |

\* Values taken from Tomé *et al.*<sup>1</sup>

## REFERENCES

1. L. C. Tomé, D. J. S. Patinha, C. S. R. Freire, L. P. N. Rebelo and I. M. Marrucho, *RSC Adv*, 2013, **3**, 12220-12229.
